# Supplementary material for: Welchen Nutzen bringen Gesundheits-Apps für die Primärversorgung? Ergebnisse einer Befragung von Allgemeinmedizinern
Source: Springer Nature journal article supplement (doi:10.1007/s11553-020-00797-7), 2020-06-26
Supplement: MOESM1 [file 18123044]

**1. Ganz allgemein gefragt: Halten Sie Gesundheits-Apps grundsätzlich für eine gute Sache, oder stehen Sie dem eher skeptisch gegenüber?**

- Gute Sache    Eher Skeptisch    Unentschieden    Keine Angabe

**2. Welchen Beitrag können Gesundheits-Apps Ihrer Meinung nach zur Gesundheitsvorsorge und/oder Genesung von Patienten – die richtige Anwendung vorausgesetzt – leisten?**

**Ist der Beitrag, den Gesundheits-Apps Ihrer Meinung nach leisten können...**

- Sehr groß    Eher groß    Eher gering    Leisten keinen Beitrag    Keine Angabe

**3. In welchen der folgenden Anwendungsbereiche sind Gesundheits-Apps Ihrer Ansicht nach sinnvoll und können eine positive Wirkung beim Patienten entfalten?**

|                                                                                                                                                                  | Sehr sinnvoll         | Eher sinnvoll         | Weniger bzw. gar nicht sinnvoll | Schwer zu sagen       |
|------------------------------------------------------------------------------------------------------------------------------------------------------------------|-----------------------|-----------------------|---------------------------------|-----------------------|
| Prävention, z.B. Selbstkontrolle von Risikofaktoren (Gewicht, Blutdruck, Blutzucker etc.) oder Gesundheitsdaten (gelaufene Schritte, Trinkmenge, Ernährung etc.) | <input type="radio"/> | <input type="radio"/> | <input type="radio"/>           | <input type="radio"/> |
| Monitoring und Therapie chronischer Erkrankungen (Diabetes, Asthma, Schmerz etc.)                                                                                | <input type="radio"/> | <input type="radio"/> | <input type="radio"/>           | <input type="radio"/> |
| Lifestyle, Einhaltung eines gesundheitsförderlichen Lebensstils (Ernährung, Rauchen etc.)                                                                        | <input type="radio"/> | <input type="radio"/> | <input type="radio"/>           | <input type="radio"/> |
| Unterstützung von physischen Maßnahmen (Bewegungsübungen in Eigenregie etc.)                                                                                     | <input type="radio"/> | <input type="radio"/> | <input type="radio"/>           | <input type="radio"/> |
| Erinnerung an die regelmäßige Einnahme von Medikamenten, Erinnerung an Impf- und Vorsorgetermine                                                                 | <input type="radio"/> | <input type="radio"/> | <input type="radio"/>           | <input type="radio"/> |
| Sonstiges, und zwar:<br>_____                                                                                                                                    | <input type="radio"/> | <input type="radio"/> | <input type="radio"/>           | <input type="radio"/> |

**4. Welchen der folgenden Aussagen stimmen Sie zu? Bitte kreuzen Sie jeweils an.**

- Gesundheits-Apps entlasten Ärzte und Pflegekräfte, weil diese sich nicht mehr um die Erfassung von Vitaldaten und Messwerten kümmern müssen
- Die Anwendung von Gesundheits-Apps ist für viele Patienten zu kompliziert, wodurch fehlerhafte Gesundheitsdaten gesammelt werden oder im Extremfall Therapien fehlschlagen
- Gesundheits-Apps stärken die Motivation und Bereitschaft von Patienten, etwas für ihre Gesundheit zu tun
- Gesundheits-Apps sind oft nicht vertrauenswürdig, weil sie personenbezogene Daten nicht ausreichend schützen
- Durch die zusätzlichen Informationen, die von Gesundheits-Apps erfasst werden, können Patienten individueller und effektiver behandelt werden
- Die Nutzung von Gesundheits-Apps ist für Patienten und Ärzte zu zeitaufwändig
- Gesundheits-Apps erleichtern die Kommunikation zwischen Arzt und Patient
- Gesundheits-Apps erzeugen eine Flut von Daten, die eine schnelle und effektive Behandlung des Patienten hinauszögern
- Durch Gesundheits-Apps lassen sich Arztkontakte zeitlich effektiver gestalten
- Durch Gesundheits-Apps wird das Arzt-Patient-Verhältnis unpersönlicher
- Gesundheits-Apps tragen dazu bei, dass Patienten besser über Gesundheits- und Krankheitsthemen aufgeklärt sind
- Durch den Einsatz von Gesundheits-Apps bei Patienten wird der Arzt stärker belastet als entlastet, weil zusätzliche Aufgaben für ihn anfallen
- Krankheiten und Krankheitsrisiken können aufgrund der Nutzung von Gesundheits-Apps schneller erkannt bzw. diagnostiziert werden
- Gesundheits-Apps führen dazu, dass Patienten ihre Diagnose und Therapie in die eigene Hand nehmen und nicht mehr zum Arzt gehen
- Gesundheits-Apps verbessern die Compliance von Patienten

**5. Was vermuten Sie: Nutzen viele Patienten Gesundheits-Apps zur Vorsorge oder Krankheitsbewältigung, oder tun das nur wenige?**

- Sehr viele    Eher viele    Eher wenige    Sehr wenige    Weiß nicht

Bitte auf Rückseite fortfahren

**6. Was schätzen Sie: Wie viele Ihrer Patienten nutzen wenigstens zeitweise Gesundheits-Apps?**

- Weniger als 5%  5-10%  10-15%  15-20%  Mehr als 20%  Weiß nicht

**7. Wenn Sie Ihre Patientenschaft insgesamt betrachten: Wie beurteilen Sie die Bereitschaft Ihrer Patienten, Gesundheits-Apps zur Vorsorge bzw. Therapie zu verwenden?**

- Sehr groß  Eher groß  Eher nicht so groß  Kaum bzw. gar keine Bereitschaft  
 Schwer zu sagen, keine Angabe

**8. Haben Sie Patienten, die Ihnen über Apps erhobene Gesundheitsdaten vorlegen (Blutdruck- oder Blutzuckertagebücher, Asthmatagebuch, Schlaganfallrisiko-Test etc.)?**

- Ja, viele  Ja, einige  Ja, aber nur wenige  Nein  Keine Angabe

**9. Wie häufig kommt es vor, dass Sie von Ihren Patienten auf Gesundheits-Apps angesprochen werden?**

- Häufig  Gelegentlich  Selten  Nie  Keine Angabe

**10. Wie häufig kommt es vor, dass Sie im Gespräch mit Ihren Patienten Gesundheits-Apps zur Vorsorge oder Krankheitsbewältigung von sich aus ansprechen?**

- Häufig  Gelegentlich  Selten  Nie  Keine Angabe

**11. Wie häufig kommt es vor, dass Sie Ihren Patienten die Nutzung von bestimmten Gesundheits-Apps zur Prävention und/oder Therapie empfehlen?**

- Häufig  Gelegentlich  Selten  Nie => Bitte direkt zu [Frage 14](#) übergehen  
 Keine Angabe

**12. Sie haben angegeben, dass es schon vorgekommen ist, dass Sie Patienten bestimmte Gesundheits-Apps empfohlen haben: Um welche Anwendungen handelt es sich dabei?**

---

---

**13. Bitte nennen Sie drei bis fünf Kriterien, die Ihnen besonders wichtig sind, wenn es darum geht, Patienten eine bestimmte Gesundheits-App zu empfehlen? Was muss eine solche Gesundheits-App Ihrer Ansicht nach vor allem erfüllen?**

---

---

**14. Denken Sie jetzt nur an diejenigen Ihrer Patienten, die Gesundheits-Apps nutzen, unabhängig davon, ob Sie diese empfohlen haben oder nicht.**

**Wie schätzen Sie den Beitrag ein, den Gesundheits-Apps im Großen und Ganzen bei diesen Patienten zur Gesundheitsvorsorge und/oder Genesung leisten bzw. geleistet haben?**

- Sehr positiv    Eher positiv    Eher negativ    Sehr negativ  
 Mir ist niemand bekannt, der Gesundheits-Apps nutzt    Keine Angabe

**15. Ist es Ihrer Ansicht nach in Ordnung, wenn man sich als Arzt bei der Therapieplanung prinzipiell auf vom Patienten mittels Gesundheits-Apps erfasste Daten verlässt, oder sind solche Daten Ihrer Ansicht nach für die Therapieplanung kritisch zu sehen?**

- In Ordnung    Kritisch zu sehen    Keine Angabe

**16. Falls Sie Patienten haben, die Ihnen über Apps erhobene Gesundheitsdaten vorlegen: Haben Sie solche App-Daten schon mal in die Therapieplanung einfließen lassen?**

- Ja    Nein    Habe keine solchen Patienten    Keine Angabe

**17. Informieren Sie sich hin und wieder über Gesundheits-Apps oder kommt das nicht vor?**

- Ja, informiere mich    Nein, kommt nicht vor    Keine Angabe

**18. Auf welchen der folgenden Plattformen informieren Sie sich schon mal über Gesundheits-Apps?**

- Health on    Deutsche Diabetesgesellschaft    afgis - Aktionsforum Gesundheitsinformationssysteme  
 Zentrum der Telemedizin im Gesundheitswesen (ZTG)    Bundesinstitut für Arzneimittel und Medizinprodukte (BfArM)    App-synopsis (Institut f. Medizininformatik, Uni Braunschweig/Hannover)  
 Sonstiges: \_\_\_\_\_

**19. Wie schätzen Sie Ihr Wissen bzw. Ihre Kompetenz ein, wenn es darum geht, das Angebot an verfügbaren Gesundheits-Apps zu überblicken?**

- Sehr gut    Eher gut    Weniger gut    Gar nicht gut

Bitte auf Rückseite fortfahren

**20. Wie schätzen Sie Ihr Wissen bzw. Ihre Kompetenz ein, wenn es darum geht, gute von schlechten Gesundheits-Apps zu unterscheiden?**

- Sehr gut  Eher gut  Weniger gut  Gar nicht gut

**21. Wie schätzen Sie Ihr Wissen bzw. Ihre Kompetenz ein, wenn es darum geht, Patienten zu Gesundheits-Apps, etwa zur Prävention und/oder Therapie, zu beraten?**

- Sehr gut  Eher gut  Weniger gut  Gar nicht gut

**22. Nun zu einigen Vorschlägen, was man in Zukunft rund um Gesundheits-Apps verbessern könnte.**

**a) Welche der folgenden Vorschläge zur Qualitätsverbesserung von Gesundheits-Apps halten Sie für besonders wichtig?**

- Überprüfung jeder Gesundheits-App durch eine Zulassungsbehörde im Vorfeld der Einführung
- Verpflichtung von Anbietern, neue Gesundheits-Apps zu zertifizieren, ehe sie angeboten werden dürfen
- Definition von verbindlichen Qualitätskriterien für Gesundheits-Apps durch den Gesetzgeber, die die Vertrauenswürdigkeit einer Anwendung gewährleisten
- Definition von verbindlichen Datenschutzstandards für Gesundheits-Apps, die den Schutz von Verbrauchern und Patienten gewährleisten

**b) Welche der folgenden Vorschläge zur Verbesserung der Rahmenbedingungen von Gesundheits-Apps halten Sie für besonders wichtig?**

- Ärzte können bei der Therapieplanung aus einem großen Angebot an Gesundheits- bzw. Medizin-Apps wählen und diese Patienten auf Rezept verordnen
- Ärzte müssen kein Haftungsrisiko übernehmen, wenn z.B. ein Behandlungsfehler aufgrund einer fehlerhaften Gesundheits-App entsteht
- Versicherte aller Krankenkassen erhalten Prämien oder Bonusprogramme, wenn sie regelmäßig bestimmte Apps nutzen und ihre Daten an die Krankenkasse weiterleiten
- Die Gebührenordnung sieht eine Honorierung von ärztlichen Leistungen vor, die im Zusammenhang mit Gesundheits-Apps erbracht werden (spezielle Beratungsziffer für die Beurteilung und Bewertung von Daten, die der Patient elektronisch dokumentiert hat)
- Systematische Weiterbildung von Ärzten hinsichtlich des Einsatzes von Gesundheits-Apps in der (hausärztlichen) Patientenversorgung durch Schaffung eines ausreichenden Angebots an entsprechenden CME-zertifizierten Fortbildungen

**23. Einmal angenommen, die von Ihnen angegebenen Punkte würden umgesetzt: Wären Sie unter diesen Voraussetzungen bereit, Gesundheits-Apps in der Patientenversorgung stärker als bislang zu berücksichtigen?**

- Ja, deutlich stärker  Ja, etwas stärker  Nein  Keine Angabe

**24. Vor kurzem hat die Bundesregierung ein Gesetz verabschiedet, das es Ärzten ermöglicht, bestimmte Gesundheits-Apps, die nachweislich zur Gesundheitsvorsorge und/oder Krankheitsbewältigung beitragen, auf Rezept zu verordnen. Wie stehen Sie dazu?**

- Finde ich gut  Finde ich nicht gut  Unentschieden  Keine Angabe

**25. Weshalb finden Sie dieses Gesetz gut bzw. nicht gut?**

---

---

**26. Käme es für Sie in Frage, Gesundheits-Apps unter bestimmten Voraussetzungen auf Rezept zu verordnen, oder würden Sie dies grundsätzlich nicht tun?**

- Käme in Frage  Würde ich grundsätzlich nicht tun => Bitte überspringen Sie Frage 28  
 Unentschieden  Keine Angabe

**27. Haben Sie konkrete Anwendungsbereiche vor Augen, für die Sie sich vorstellen könnten, Patienten Gesundheits-Apps zu verschreiben? Falls ja, welche wären dies?**

---

---

Bitte auf Rückseite fortfahren

*Nun bräuchten wir noch einige statistische Angaben von Ihnen. Wie auch der Rest des Fragebogens werden diese Informationen natürlich streng vertraulich behandelt und anonymisiert.*

**Sind sind...**

- Männlich    Weiblich    Divers

**Ihr Alter:** \_\_\_\_\_

**Wo befindet sich Ihre Praxis?** In einer Gemeinde/Stadt mit . . .

- mehr als 100.000    20.000 bis 100.000    5.000 bis 20.000    unter 5.000 Einwohnern

**Welches Niederlassungsmodell** beschreibt Ihre Praxis am besten?

- Einzelpraxis (Sie sind der/die einzige Arzt/Ärztin)    Einzelpraxis mit angestellten Ärzten  
 Gemeinschaftspraxis    Praxisgemeinschaft    Sonstiges

**Wie viele Patienten** behandelt Ihre Praxis im Quartal?

- 500 bis 750    751 bis 1000    1001 bis 1500    1501 bis 2000    Mehr als 2000

**Vielen Dank für Ihre Teilnahme!**

**Sollten Sie diese Befragung schriftlich ausgefüllt haben, nutzen Sie bitte  
den von uns beigefügten Rückumschlag.**

Was möchten Sie uns noch mitteilen? Hier finden Sie Platz für Anregungen, Kommentare und Kritik.

---

---

---
